# Supplementary material for: Satellite cells maintain regenerative capacity but fail to repair disease-associated muscle damage in mice with Pompe disease
Source: PubMed Central journal article supplement (PMC6220463; doi:10.1186/s40478-018-0620-3), 2018-11-07

WT(FVB) 15 wks TA

*Gaa*<sup>-/-</sup>(FVB) 15 wks TA

HE

TC

HE

TC

Uninj.

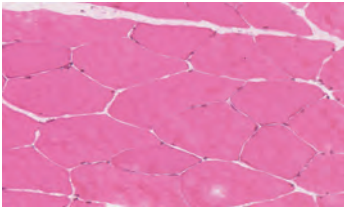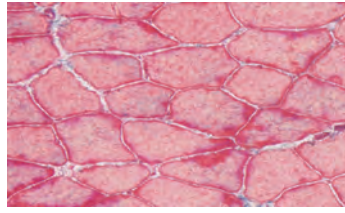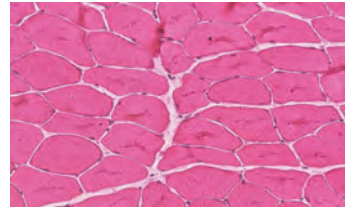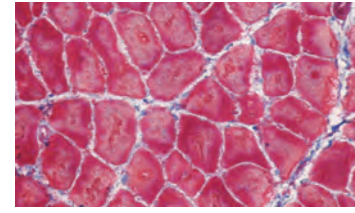

1DPI

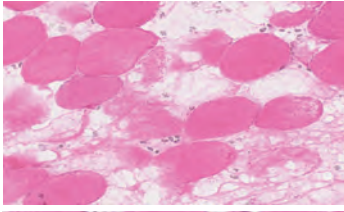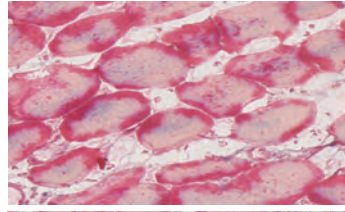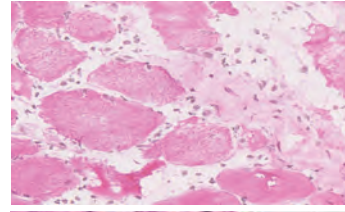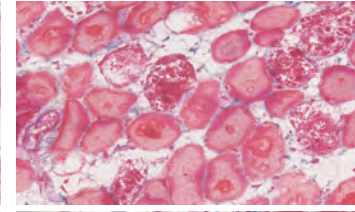

3DPI

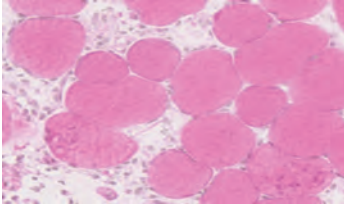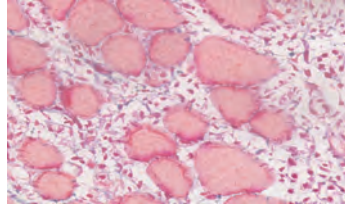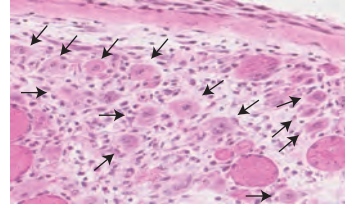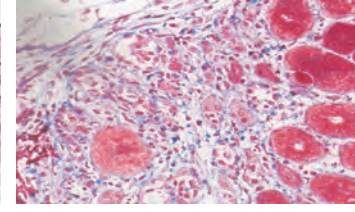

5DPI

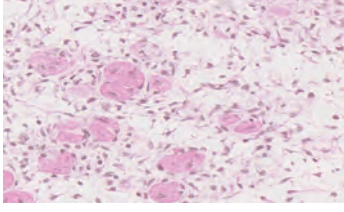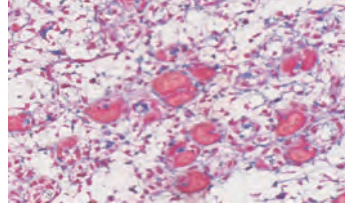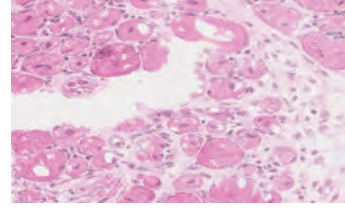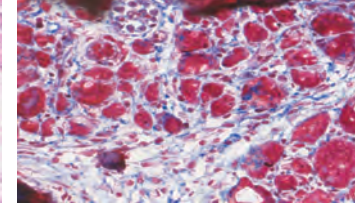

7DPI

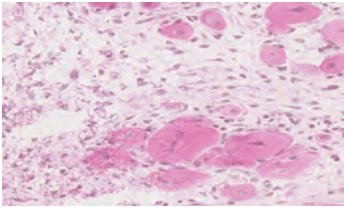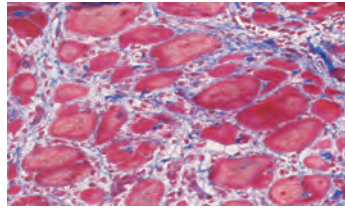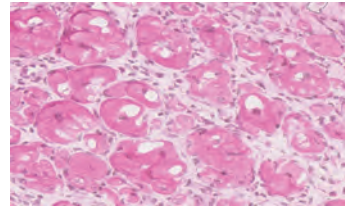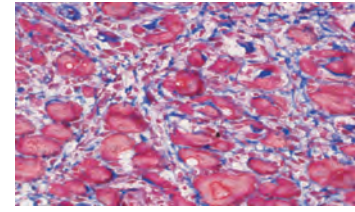

9DPI

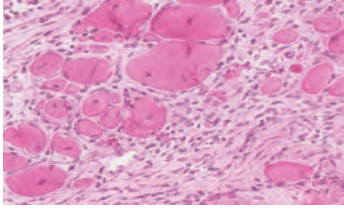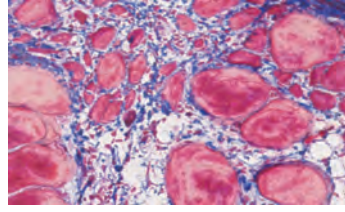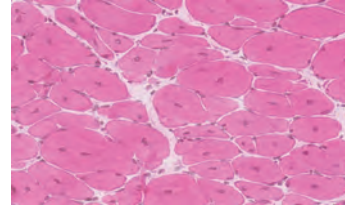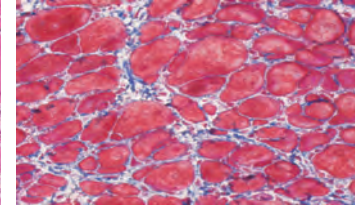

11DPI

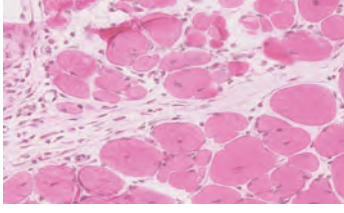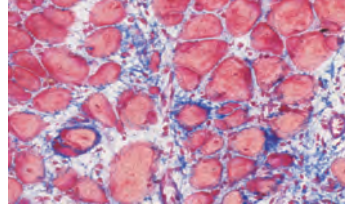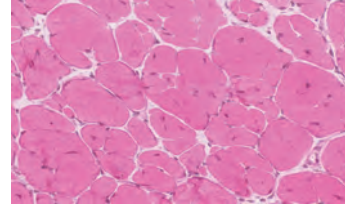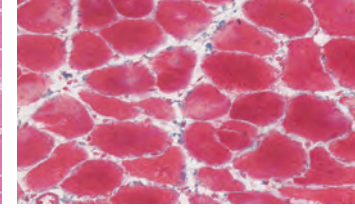

13DPI

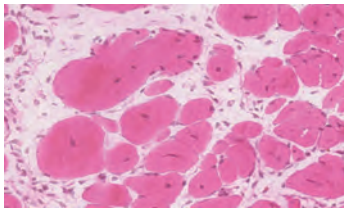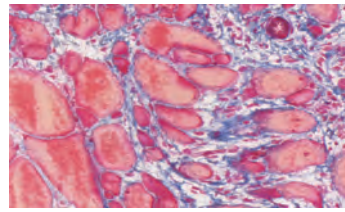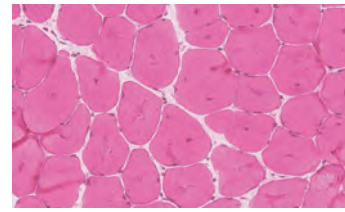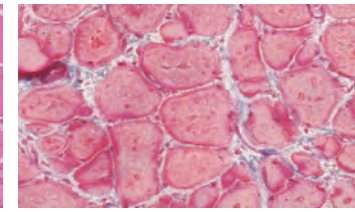

15DPI

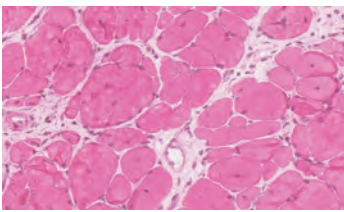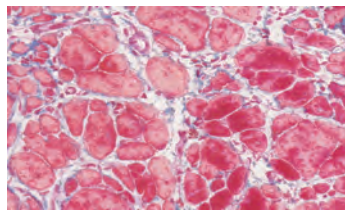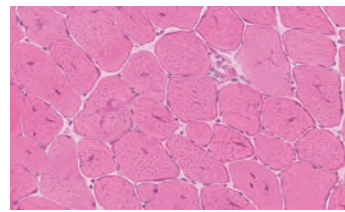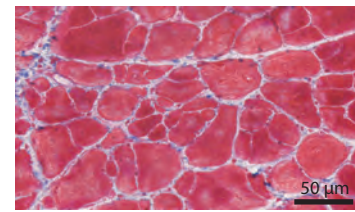

Supplement: 40478_2018_620_MOESM7_ESM.pdf [file 40478_2018_620_MOESM7_ESM.pdf]
