# Supplementary material for: Satellite cells maintain regenerative capacity but fail to repair disease-associated muscle damage in mice with Pompe disease
Source: PubMed Central journal article supplement (PMC6220463; doi:10.1186/s40478-018-0620-3), 2018-11-07

**A**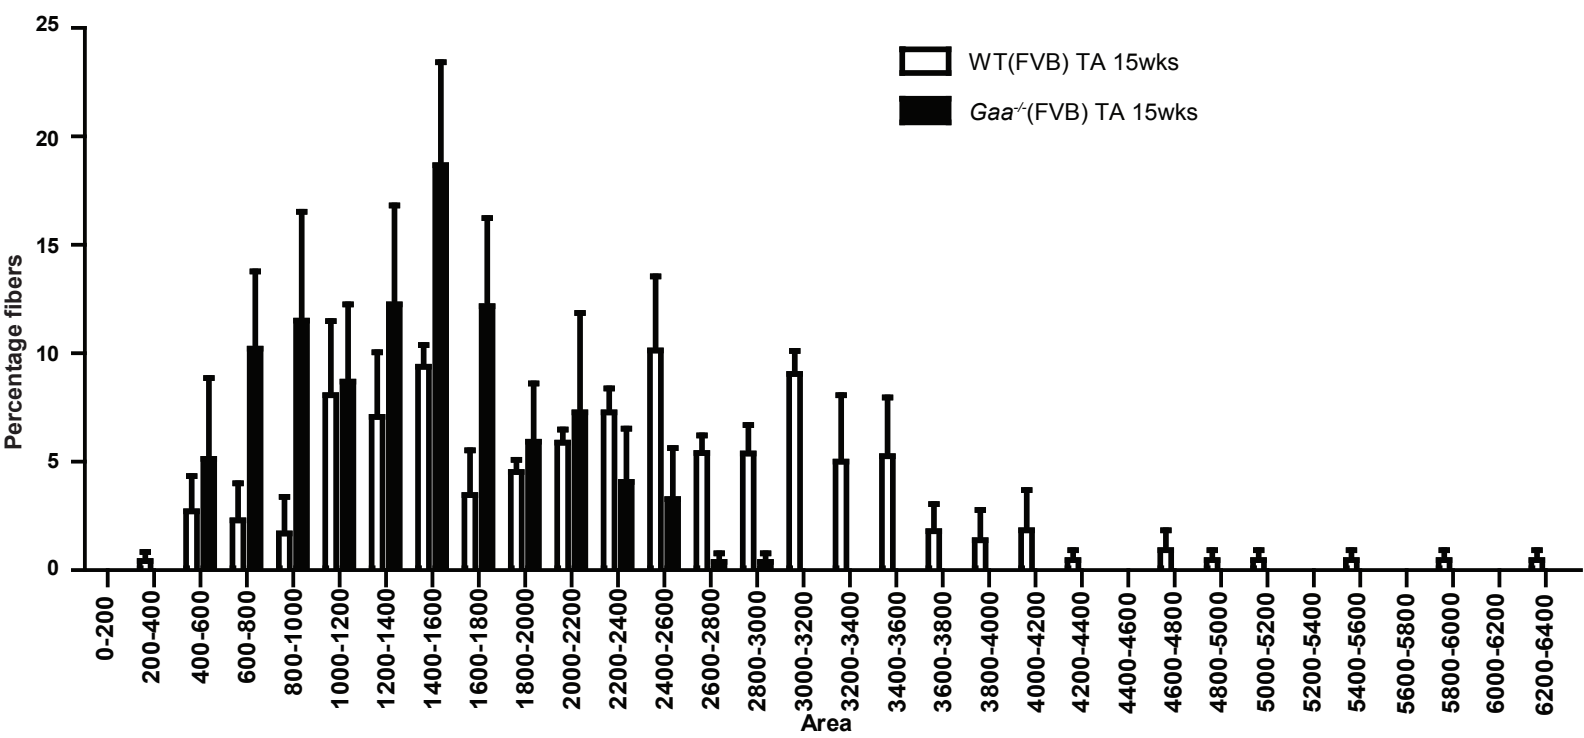**B**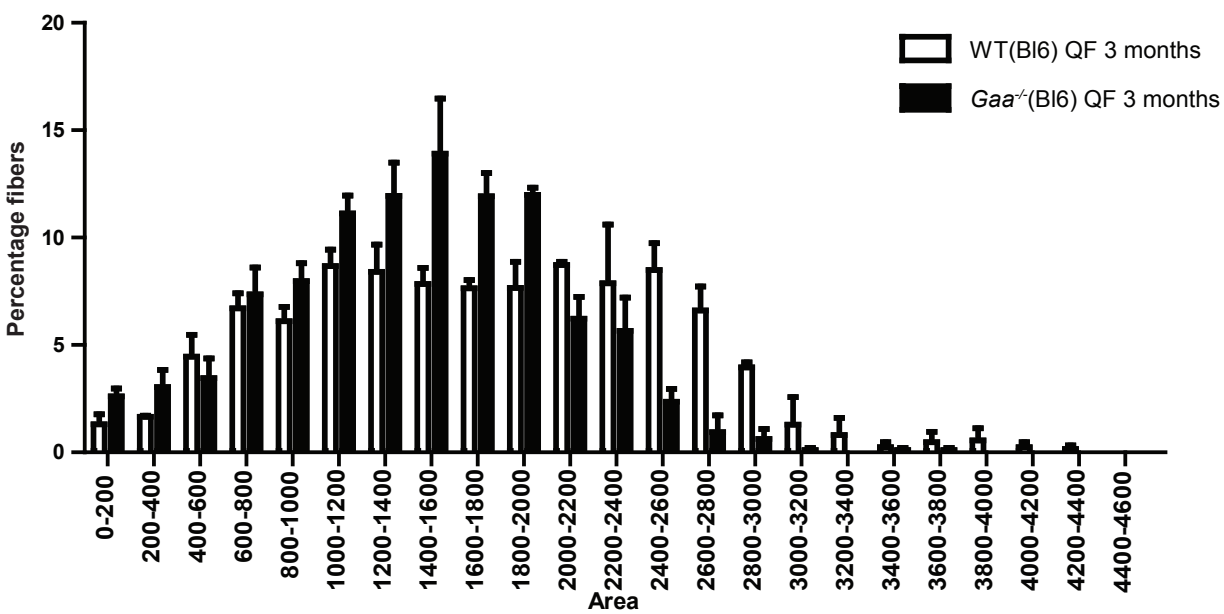

Supplement: 40478_2018_620_MOESM1_ESM.pdf [file 40478_2018_620_MOESM1_ESM.pdf]
